# Supplementary material
Source: PubMed Central journal article supplement (PMC5710414)

## Supplementary Online Content

Billig JI, Lu Y, Momoh AO, Chung KC. A nationwide analysis of cost variation for autologous free flap breast reconstruction. *JAMA Surg*. Published online July 19, 2017. doi:10.1001/jamasurg.2017.2339

**eTable 1.** Diagnosis and Procedure Codes for Breast Cancer and Free Flap Breast Reconstruction

**eTable 2.** Code List for Surgical Complications, Systemic Complications, and Charlson Comorbidity Index

**eTable 3.** Effect Estimates of Patients Who Underwent Autologous Free Flap Breast Reconstruction by Hospital Volume From 2008 to 2010 in the U.S.

**eTable 4.** Effect Estimates of Patients Who Underwent Autologous Free Flap Breast Reconstruction by Region From 2008 to 2010 in the U.S.

**eFigure.** Flow Diagram of Patients Undergoing Free Flap Breast Reconstruction Using National Inpatient Sample Database, 2008-2010

This supplementary material has been provided by the authors to give readers additional information about their work.

**eTable 1.** Diagnosis and Procedure Codes for Breast Cancer and Free Flap Breast Reconstruction

| Coding System         | Codes  | Definition                                                   |
|-----------------------|--------|--------------------------------------------------------------|
| ICD-9* Diagnosis Code | 174.0  | Malignant neoplasm of female breast: nipple and areola       |
|                       | 174.1  | Malignant neoplasm of female breast: central portion         |
|                       | 174.2  | Malignant neoplasm of female breast: upper inner-quadrant    |
|                       | 174.3  | Malignant neoplasm of female breast: lower-inner quadrant    |
|                       | 174.4  | Malignant neoplasm of female breast: upper-outer quadrant    |
|                       | 174.5  | Malignant neoplasm of female breast: lower-outer quadrant    |
|                       | 174.6  | Malignant neoplasm of female breast: axillary tail           |
|                       | 174.8  | Malignant neoplasm of female breast: other sites             |
|                       | 174.9  | Malignant neoplasm of female breast: unspecified             |
|                       | 233.0  | Carcinoma in situ of breast                                  |
|                       | 238.3  | Neoplasm of uncertain behavior of breast                     |
|                       | 239.3  | Neoplasm of unspecified nature of breast                     |
|                       | v16.3  | Family history of malignant neoplasm                         |
|                       | v10.3  | Personal history of breast malignant neoplasm                |
|                       | v84.01 | Genetic susceptibility to malignant neoplasm of breast       |
|                       | v50.41 | Prophylactic removal of breast                               |
| ICD-9* Procedure Code | 85.70  | Other total reconstruction of breast (free-flap)             |
|                       | 85.73  | Transverse rectus abdominis myocutaneous flap, free          |
|                       | 85.74  | Deep interior epigastric artery perforator (DIEP) flap, free |
|                       | 85.75  | Superficial inferior epigastric artery (SIEA) flap, free     |
|                       | 85.76  | Gluteal artery perforator (GAP) flap, free                   |

\* International Classification of Disease, Ninth Revision, Clinical Modification

**eTable 2.** Code List for Surgical Complications, Systemic Complications, and Charlson Comorbidity Index

| Variables                                     | ICD-9* code                                                                                                                                                                                                                                                                                                                                                                                                                                                                                                                                 |
|-----------------------------------------------|---------------------------------------------------------------------------------------------------------------------------------------------------------------------------------------------------------------------------------------------------------------------------------------------------------------------------------------------------------------------------------------------------------------------------------------------------------------------------------------------------------------------------------------------|
| Surgery-specific complications                |                                                                                                                                                                                                                                                                                                                                                                                                                                                                                                                                             |
| Wound dehiscence                              | 998.11                                                                                                                                                                                                                                                                                                                                                                                                                                                                                                                                      |
| Wound infection                               | 998.5, 998.51, 998.59, 998.6                                                                                                                                                                                                                                                                                                                                                                                                                                                                                                                |
| Flap revision                                 | 86.75                                                                                                                                                                                                                                                                                                                                                                                                                                                                                                                                       |
| Hematoma                                      | 998.11, 998.12                                                                                                                                                                                                                                                                                                                                                                                                                                                                                                                              |
| Microvascular anastomosis complications       | 39.4, 39.41, 39.49, 86.75, 38.0, 38.3, 39.3, 39.30, 39.31, 39.32, 39.56, 39.57, 39.58, 39.59                                                                                                                                                                                                                                                                                                                                                                                                                                                |
| Transfusion                                   | 99.0, 99.00, 99.03, 99.04, v58.2                                                                                                                                                                                                                                                                                                                                                                                                                                                                                                            |
| Systemic complications                        |                                                                                                                                                                                                                                                                                                                                                                                                                                                                                                                                             |
| Stroke                                        | 997.02                                                                                                                                                                                                                                                                                                                                                                                                                                                                                                                                      |
| Urinary                                       | 997.5                                                                                                                                                                                                                                                                                                                                                                                                                                                                                                                                       |
| Deep venous thrombosis/<br>Pulmonary embolism | 415.1, 415.11, 415.19, 451.1, 451.2, 451.81, 451.19, 453.4, 453.41, 453.42, 453.8, 453.9, v12.51, 997.2, 999.2, 997.79                                                                                                                                                                                                                                                                                                                                                                                                                      |
| Digestive                                     | 997.4, 536.1, 536.2, 558.9, 560, 560.1, 560.2, 560.9                                                                                                                                                                                                                                                                                                                                                                                                                                                                                        |
| Cardiovascular                                | 997.1, 428.0, 428.1, 428.2, 428.3, 428.9, 40, 411, 411.1, 411.81, 411.89, 427.9, 427.31, 427.32, 427.3, 427.0, 427.8, 427.81, 427.89                                                                                                                                                                                                                                                                                                                                                                                                        |
| Respiratory                                   | 997.3, 997.39, 518.5, 518.4, 480, 481, 482, 483, 484, 485, 486, 480.8, 482.8, 514                                                                                                                                                                                                                                                                                                                                                                                                                                                           |
| Charlson Comorbidity Score                    |                                                                                                                                                                                                                                                                                                                                                                                                                                                                                                                                             |
| 1 each                                        | Myocardial Infarction: 410-410.9, 412<br>Congestive heart failure: 428-428.9<br>Peripheral Vascular disease: 443.9, 441 (441.0-441.9), 785.4, v43.4, procedure 38.48<br>Cerebrovascular disease: 430-438<br>Dementia: 290-290.9<br>Chronic pulmonary disease: 490-496, 500-505, 506.4<br>Rheumatologic disease: 710.0, 710.1, 710.4, 714.0-714.2, 714.81, 725<br>Peptic ulcer disease: 531-534.9<br>Mild liver disease: 571.2, 571.5, 571.6, 571.4-571.49<br>Diabetes: 250-250.3, 250.7<br>Diabetes with chronic complications: 250.4-250.6 |

|        |                                                                                                                                                       |
|--------|-------------------------------------------------------------------------------------------------------------------------------------------------------|
| 2 each | Hemiplegia or paraplegia: 344.1, 342-342.9<br>Renal disease: 582-582.9, 583-583.7, 585, 586, 588-588.9<br>Malignancy: 140-172.9, 174-195.8, 200-208.9 |
| 3 each | Moderate or Severe liver disease: 572.2-572.8, 456.0-456.21                                                                                           |
| 6 each | Metastatic solid tumor: 196-199.1<br>AIDS: 042-044.9                                                                                                  |

\* International Classification of Disease, Ninth Revision, Clinical Modification

**eTable 3.** Effect Estimates of Patients Who Underwent Autologous Free Flap Breast Reconstruction by Hospital Volume From 2008 to 2010 in the U.S.†

| Hospital volume<br>No. of patients           |                         | Medium volume (11-30<br>cases) hospitals<br>vs low volume ( $\leq 10$ cases)<br>hospitals<br>(1,029 vs 1,174) |                        | High volume ( $\geq 31$ cases)<br>hospitals<br>vs low volume ( $\leq 10$ cases)<br>hospitals<br>(1,029 vs 1,099) |                         |
|----------------------------------------------|-------------------------|---------------------------------------------------------------------------------------------------------------|------------------------|------------------------------------------------------------------------------------------------------------------|-------------------------|
|                                              |                         | Odds Ratio                                                                                                    | 95% CI                 | Odds Ratio                                                                                                       | 95% CI                  |
| Dependent variable                           |                         |                                                                                                               |                        |                                                                                                                  |                         |
| Cost                                         |                         | 1.000024                                                                                                      | (1.000018-<br>1.00003) | 1.00002                                                                                                          | (1.000014-<br>1.000027) |
| Independent variables                        |                         |                                                                                                               |                        |                                                                                                                  |                         |
| Age                                          |                         | 0.992                                                                                                         | (0.983-<br>1.001)      | 0.983                                                                                                            | (0.974-0.993)           |
| Length of stay                               |                         | 1.101                                                                                                         | (1.055-<br>1.149)      | 1.062                                                                                                            | (1.017-1.110)           |
| Insurance type                               |                         |                                                                                                               |                        |                                                                                                                  |                         |
|                                              | Medicare                | 0.602                                                                                                         | (0.439-<br>0.825)      | 0.463                                                                                                            | (0.331-0.646)           |
|                                              | Medicaid                | 0.721                                                                                                         | (0.523-<br>0.993)      | 0.205                                                                                                            | (0.128-0.329)           |
|                                              | Other insurance         | 0.717                                                                                                         | (0.478-<br>1.074)      | 0.092                                                                                                            | (0.040-0.215)           |
|                                              | Private insurance (ref) |                                                                                                               |                        |                                                                                                                  |                         |
| Median household income<br>national quartile |                         |                                                                                                               |                        |                                                                                                                  |                         |
|                                              | First quartile          | 0.438                                                                                                         | (0.518-<br>0.948)      | 0.619                                                                                                            | (0.479-0.800)           |
|                                              | Second quartile         | 0.715                                                                                                         | (0.564-<br>0.907)      | 0.612                                                                                                            | (0.478-0.783)           |
|                                              | Third quartile          | 0.692                                                                                                         | (0.561-<br>0.855)      | 0.609                                                                                                            | (0.491-0.757)           |
|                                              | Fourth quartile (ref)   |                                                                                                               |                        |                                                                                                                  |                         |
| Race                                         |                         |                                                                                                               |                        |                                                                                                                  |                         |
|                                              | Black                   | 0.701                                                                                                         | (0.518-<br>0.948)      | 0.544                                                                                                            | (0.388-0.763)           |
|                                              | Hispanic                | 0.660                                                                                                         | (0.474-0.92)           | 1.614                                                                                                            | (1.219-2.138)           |
|                                              | Other minorities        | 1.057                                                                                                         | (0.723-<br>1.544)      | 1.637                                                                                                            | (1.145-2.340)           |
|                                              | Unspecified             | 1.692                                                                                                         | (1.311-<br>2.185)      | 1.586                                                                                                            | (1.216-2.069)           |
|                                              | White (ref)             |                                                                                                               |                        |                                                                                                                  |                         |
| Location                                     |                         |                                                                                                               |                        |                                                                                                                  |                         |

|                            |                 |       |               |       |                |
|----------------------------|-----------------|-------|---------------|-------|----------------|
|                            | Midwest         | 2.207 | (1.704-2.858) | 2.345 | (1.757-3.130)  |
|                            | South           | 0.760 | (0.598-0.967) | 1.622 | (1.258-2.090)  |
|                            | West            | 1.856 | (1.431-2.409) | 3.200 | (2.423-4.226)  |
|                            | Northeast (ref) |       |               |       |                |
| Charlson comorbidity index |                 |       |               |       |                |
|                            | 1               | 0.816 | (0.582-1.145) | 0.673 | (0.473-0.958)  |
|                            | ≥2              | 0.886 | (0.743-1.057) | 0.766 | (0.641-0.916)  |
|                            | 0 (ref)         |       |               |       |                |
| Teaching hospital          |                 |       |               |       |                |
|                            | Yes             | 3.249 | (2.654-3.977) | 9.375 | (7.101-12.378) |
|                            | No (ref)        |       |               |       |                |
| Hospital type              |                 |       |               |       |                |
|                            | Government      | 3.180 | (2.478-4.079) | 4.685 | (3.522-6.234)  |
|                            | Private (ref)   |       |               |       |                |
| Bed size                   |                 |       |               |       |                |
|                            | Medium          | 0.897 | (0.653-1.234) | 0.000 | NA             |
|                            | Large           | 1.206 | (0.917-1.584) | 1.232 | (0.946-1.605)  |
|                            | Small (ref)     |       |               |       |                |
| Surgery complication       |                 |       |               |       |                |
|                            | Yes             | 1.290 | (1.061-1.569) | 0.671 | (0.539-0.835)  |
|                            | No (ref)        |       |               |       |                |
| Systemic complication      |                 |       |               |       |                |
|                            | Yes             | 0.995 | (0.828-1.195) | 0.723 | (0.596-0.876)  |
|                            | No (ref)        |       |               |       |                |

†From 2008-2012 Healthcare Cost and Utilization Project National Inpatient Samples Database

**eTable 4.** Effect Estimates of Patients Who Underwent Autologous Free Flap Breast Reconstruction by Region From 2008 to 2010 in the U.S.†

| Location of Hospital<br>(No. of patients) |                         | West vs Northeast<br>(798 vs 617) |                     |
|-------------------------------------------|-------------------------|-----------------------------------|---------------------|
|                                           |                         | Odds Ratio                        | 95% CI              |
| Cost                                      |                         | 1.00011                           | (1.000093-1.000121) |
| Age                                       |                         | 1.001                             | (0.989-1.013)       |
| Length of stay                            |                         | 1.250                             | (1.171-1.334)       |
| Insurance type                            |                         |                                   |                     |
|                                           | Medicare                | 1.089                             | (0.727-1.633)       |
|                                           | Medicaid                | 1.264                             | (0.793-2.014)       |
|                                           | Other insurance         | 0.485                             | (0.250-0.939)       |
|                                           | Private insurance (ref) |                                   |                     |
| Median household income national quartile |                         |                                   |                     |
|                                           | First quartile          | 0.999                             | (0.727-1.633)       |
|                                           | Second quartile         | 1.887                             | (0.793-2.014)       |
|                                           | Third quartile          | 1.449                             | (0.250-0.939)       |
|                                           | Fourth quartile (ref)   |                                   |                     |
| Race                                      |                         |                                   |                     |
|                                           | Black                   | 0.385                             | (0.234-0.632)       |
|                                           | Hispanic                | 0.995                             | (0.691-1.433)       |
|                                           | Other minorities        | 1.583                             | (1.037-2.416)       |
|                                           | Unspecified             | 6.156                             | (2.611-14.517)      |
|                                           | White (ref)             |                                   |                     |
| Hospital volume                           |                         |                                   |                     |
|                                           | 11-30                   | 1.856                             | (1.431-2.409)       |
|                                           | ≥31                     | 3.199                             | (2.422-4.225)       |
|                                           | ≤10 (ref)               |                                   |                     |
| Charlson comorbidity index                |                         |                                   |                     |
|                                           | 1                       | 1.017                             | (0.630-1.642)       |
|                                           | ≥2                      | 0.407                             | (0.325-0.511)       |
|                                           | 0 (ref)                 |                                   |                     |
| Teaching hospital                         |                         |                                   |                     |
|                                           | Yes                     | 0.203                             | (0.146-0.282)       |
|                                           | No                      |                                   |                     |
| Hospital type                             |                         |                                   |                     |
|                                           | Government              | NA                                | NA                  |
|                                           | Private                 |                                   |                     |
| Surgery complication                      |                         |                                   |                     |
|                                           | Yes                     | 0.902                             | (0.701-1.160)       |
|                                           | No                      |                                   |                     |

|                       |       |               |
|-----------------------|-------|---------------|
| Systemic complication |       |               |
| Yes                   | 0.892 | (0.700-1.136) |
| No                    |       |               |
| Bed size              |       |               |
| Small                 | 0.868 | (0.522-1.364) |
| Medium                | 1.811 | (1.286-2.552) |
| Large                 |       |               |

†From 2008-2012 Healthcare Cost and Utilization Project National Inpatient Samples Database



eFigure: Flow diagram of patients undergoing free-flap breast reconstruction using National Inpatient Sample database, 2008-2010

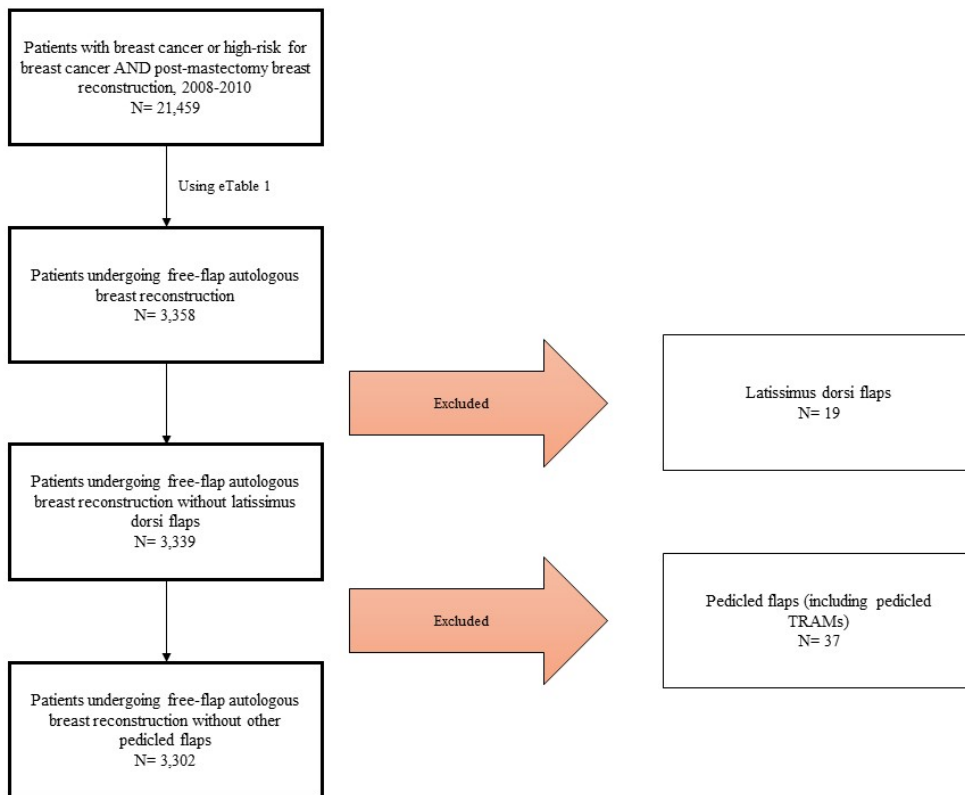

Supplement: jamasurg-152-1039-s001.pdf [file jamasurg-152-1039-s001.pdf]
